# Supplementary material
Source: PubMed Central journal article supplement (PMC5816168)
Supplement: pnas.201715354SI.pdf [file pnas.201715354SI.pdf]

# Supporting Information

Madry et al. 10.1073/pnas.1715354115

## Apyrase Alters the Electrophysiological Properties of Microglial Cells

To investigate the effect of apyrase and high extracellular  $[K^+]$  on the electrical properties of microglial cells, we recorded their current response to brief voltage steps away from the resting potential. Under control conditions, microglial cells showed small time-independent currents with a slight outward rectification when stepping from  $-124$  to  $+56$  mV, indicating the absence of any voltage-gated ion channels and reflecting their high membrane resistance (Fig. S1). Application of 100 U/mL apyrase triggered the activation of an inwardly rectifying conductance in microglial cells which required  $K^+$  as the main intracellular

cation and was blocked by  $Cs^+$  (Fig. S1 *A* and *C*). The apyrase-evoked inward  $K^+$  current was mimicked when applying (in the absence of apyrase) a concentration of potassium (raised by 20 mM) equivalent to that present in the solution containing apyrase, and was sensitive to  $100 \mu M Ba^{2+}$ , a selective blocker of inwardly rectifying  $K^+$  channels (Fig. S1 *B* and *D*). Thus, the high  $[K^+]$  content in the apyrase preparation triggers the activation of an inwardly rectifying  $K^+$  conductance in microglia, which has recently been identified as being mediated mainly by  $K_{ir}2.1$  (78), the conductance of which increases when external  $[K^+]$  rises (79). Dialyzing the  $K^+$  out of the apyrase abolished these effects of apyrase (Fig. S2).
